# Supplementary material for: Ultrasound-Assisted Water Extraction of Gentiopicroside, Isogentisin, and Polyphenols from Willow Gentian “Dust” Supported by Hydroxypropyl-β-Cyclodextrin as Cage Molecules
Source: MDPI journal article supplement (doi:10.3390/molecules27217606), 2022-11-06
Supplement: s1 [file s1]

Supplementary Material

Design-Expert® Software

Gentiopicroside

Color points by value of  
Gentiopicroside:  
35.7363 49.0304

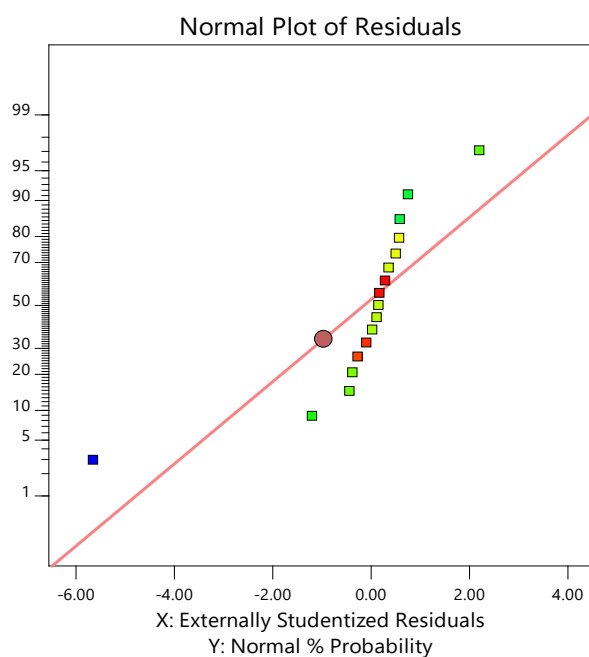

**Figure S1.** The normal probability plot for gentiopicroside.

Design-Expert® Software

Isogentisin

Color points by value of  
Isogentisin:  
0.374122 0.571957

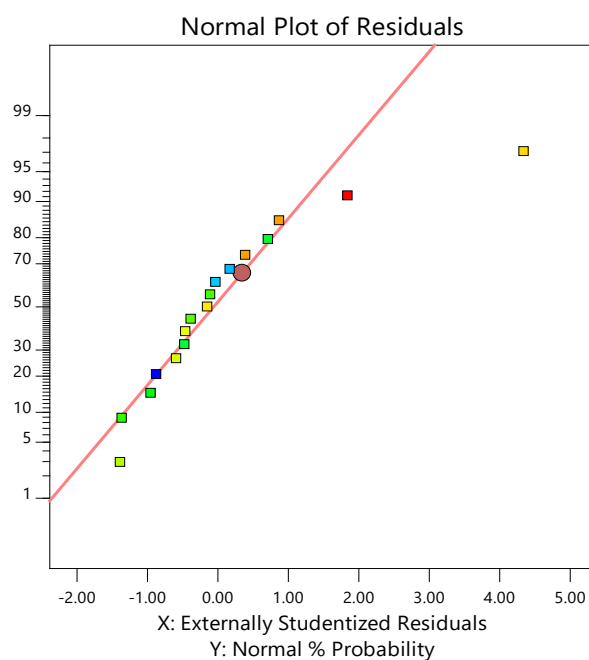

**Figure S2.** The normal probability plot for isogentisin.

Design-Expert® Software

TPC

Color points by value of

TPC:

10.5539 13.1757

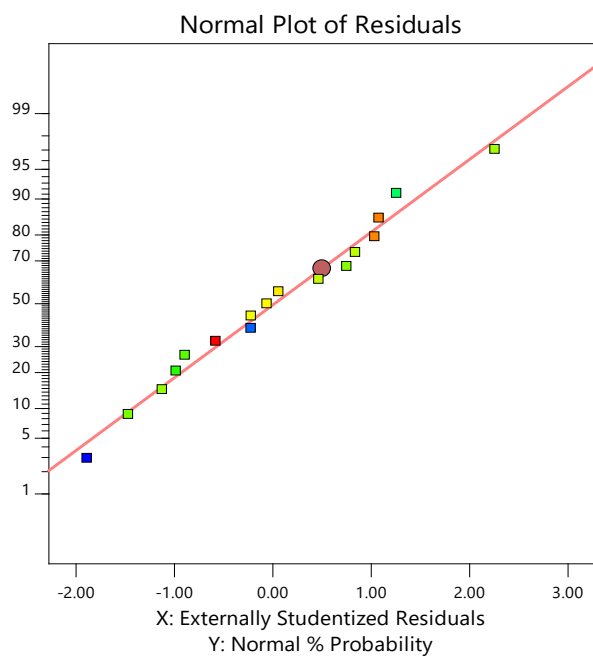

**Figure S3.** The normal probability plot for total phenolics.
